# Supplementary material for: Prioritized mass spectrometry increases the depth, sensitivity and data completeness of single-cell proteomics
Source: Springer Nature journal article supplement (doi:10.1038/s41592-023-01830-1), 2023-04-03
Supplement: MOESM1 [file 41592_2023_1830_MOESM1_ESM.pdf]

# Prioritized mass spectrometry increases the depth, sensitivity and data completeness of single-cell proteomics

---

In the format provided by the  
authors and unedited

# Supplementary Information

## Prioritized mass spectrometry increases the depth, sensitivity, and data completeness of single-cell proteomics

R Gray Huffman,<sup>1</sup> Andrew Leduc,<sup>1</sup> Christoph Wichmann,<sup>2</sup> Marco di Gioia,<sup>3</sup> Francesco Borriello,<sup>3</sup> Harrison Specht,<sup>1</sup> Jason Derks,<sup>1</sup> Saad Khan,<sup>1</sup> Luke Khoury,<sup>1</sup> Edward Emmott,<sup>1,4</sup> Aleksandra A. Petelski,<sup>1</sup> David H Perlman,<sup>5</sup> Jürgen Cox,<sup>2</sup> Ivan Zanoni,<sup>3</sup> and Nikolai Slavov<sup>1,✉</sup>

<sup>1</sup>Departments of Bioengineering, Biology, Chemistry and Chemical Biology, Single Cell Center, and Barnett Institute, Northeastern University, Boston, MA 02115, USA

<sup>2</sup>Computational Systems Biochemistry Research Group, Max Planck Institute of Biochemistry, Germany

<sup>3</sup>Boston Children's Hospital and Harvard Medical School, Boston, MA 02115, USA

<sup>4</sup>Centre for Proteome Research, Department of Biochemistry & Systems Biology, University of Liverpool, UK

<sup>5</sup>Merck Exploratory Sciences Center, Merck Sharp & Dohme Corp., 320 Bent St. Cambridge, MA 02141, USA

✉ Correspondence: [nslavov@northeastern.edu](mailto:nslavov@northeastern.edu)

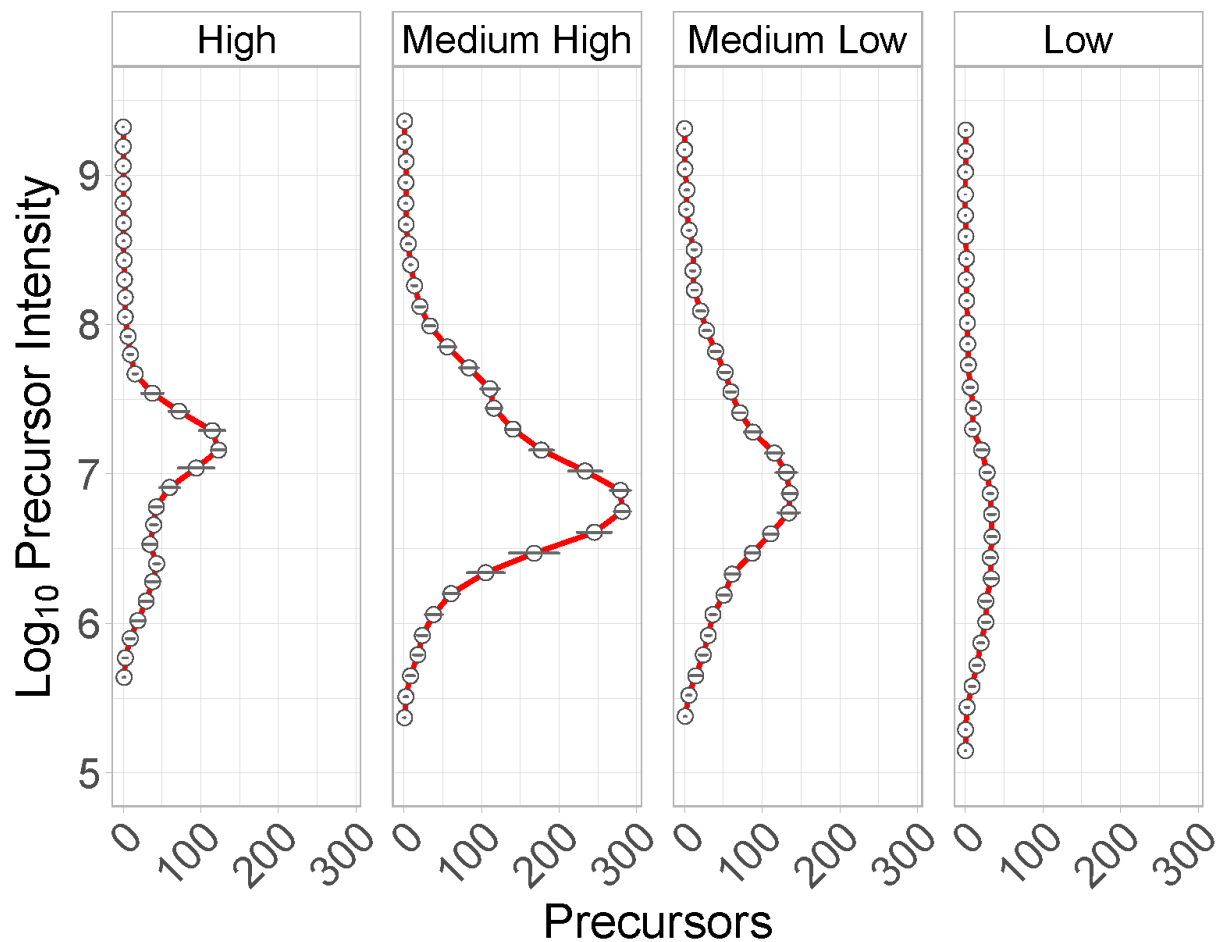

**Supplemental Fig. S1 | Precursor intensity comparison for prioritized analyses** Comparison of precursor intensities stratified by priority level for the experiments shown in Fig. 2b.  $n = 8$  experiments conducted using prioritized data acquisition. Data are represented by the median, and error bars denote the standard deviation.

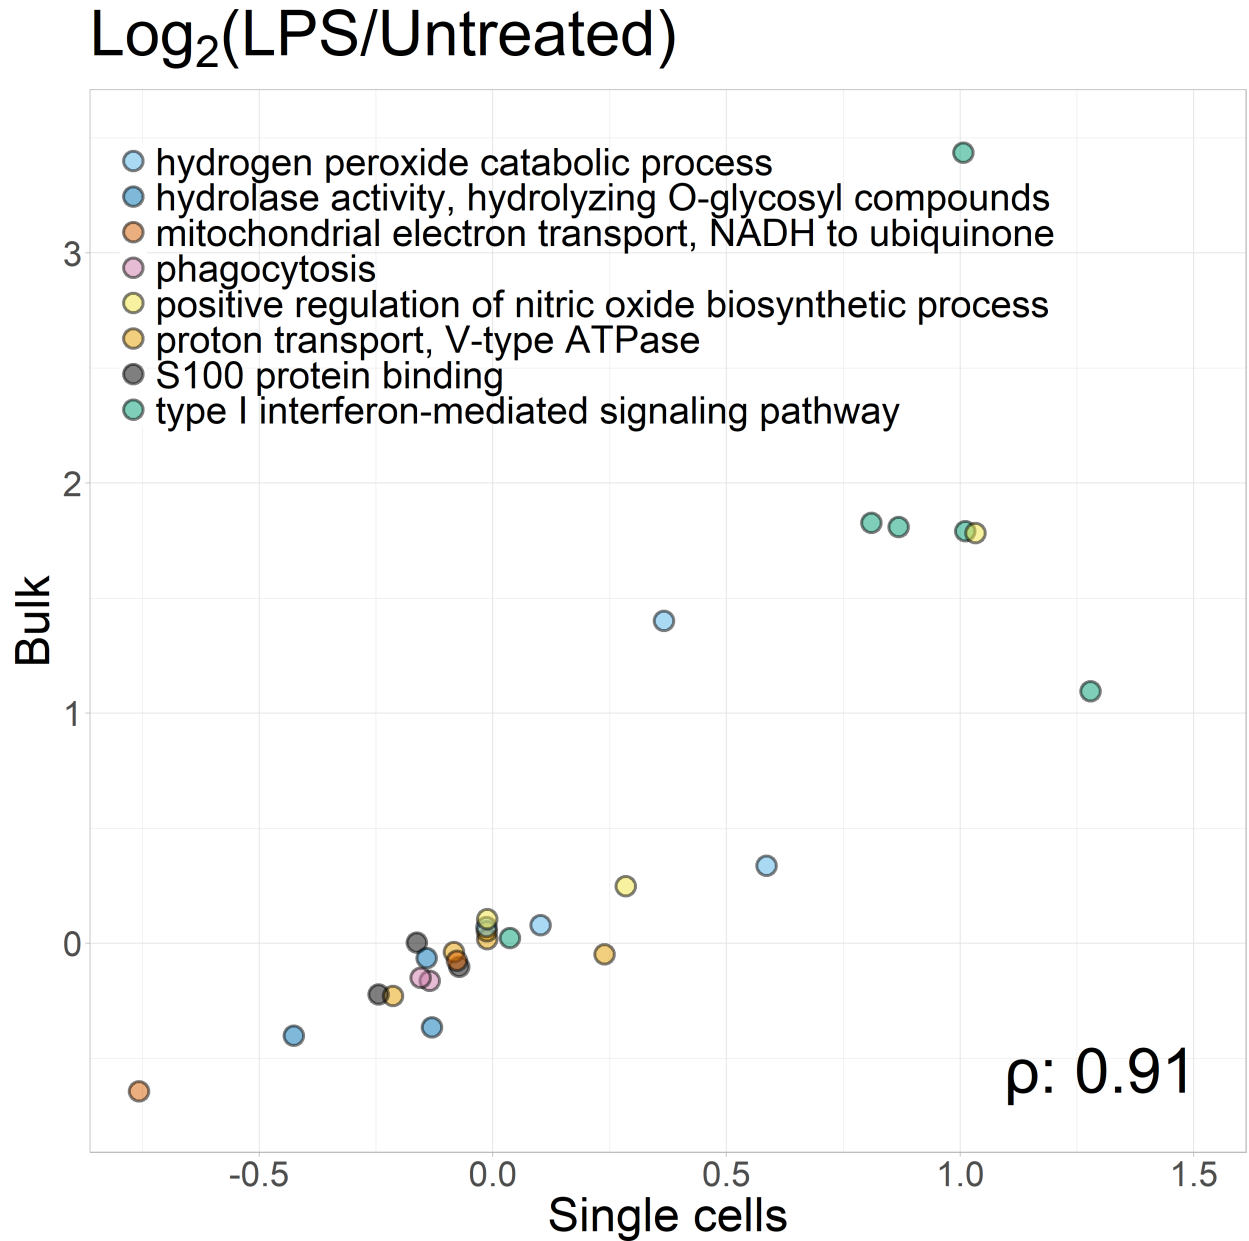

**Supplemental Fig. S2 | GO-term-associated protein fold changes** The protein fold-changes (LPS-treated / untreated macrophages) were estimated both from the single cells and from bulk samples. The corresponding estimates correlate positively with a Spearman correlation  $\rho = 0.91$  computed using all 28 proteins shown (p-value =  $2 \times 10^{-11}$ ). Proteins previously annotated as "other GO terms" in Fig. 4c are explicitly annotated, here.

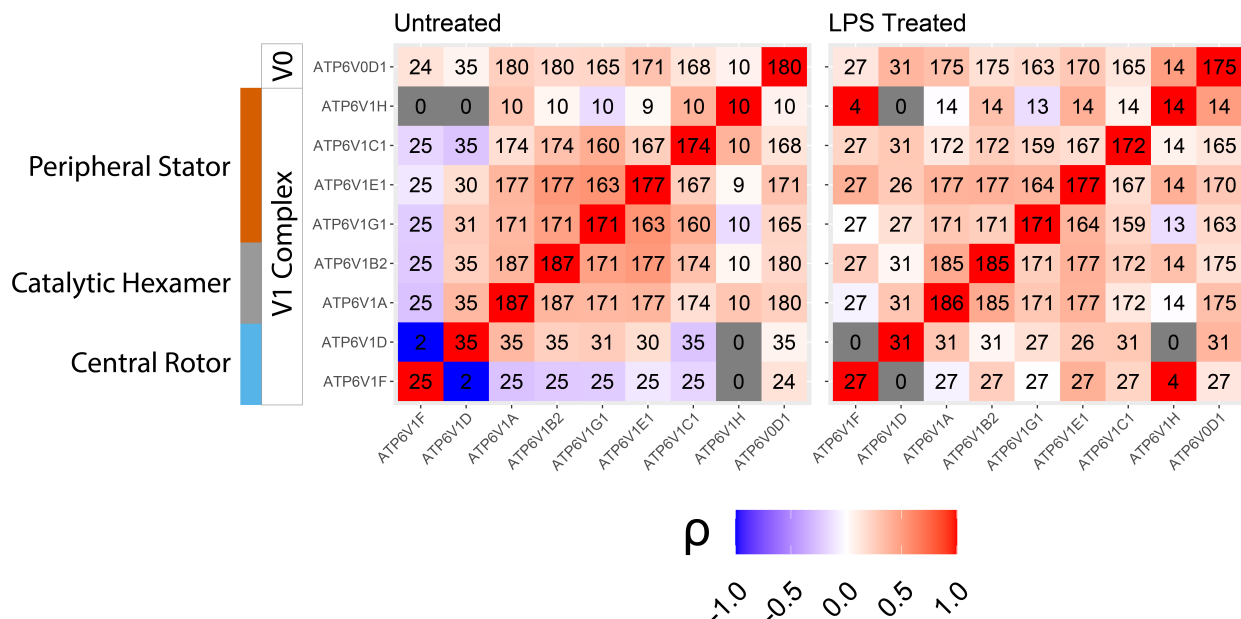

**Supplemental Fig. S3 | Protein-protein correlations associated with the V-type ATPase** Spearman correlations calculated for all quantified proteins associated with the V-type ATPase, two of which were excerpted in Fig. 4d. For each protein-protein correlation, the number of single cells in which both proteins were quantified is indicated within its respective heatmap tile. Structural annotations of these ATPase-associated proteins are indicated to the left of the untreated protein-protein heatmap.

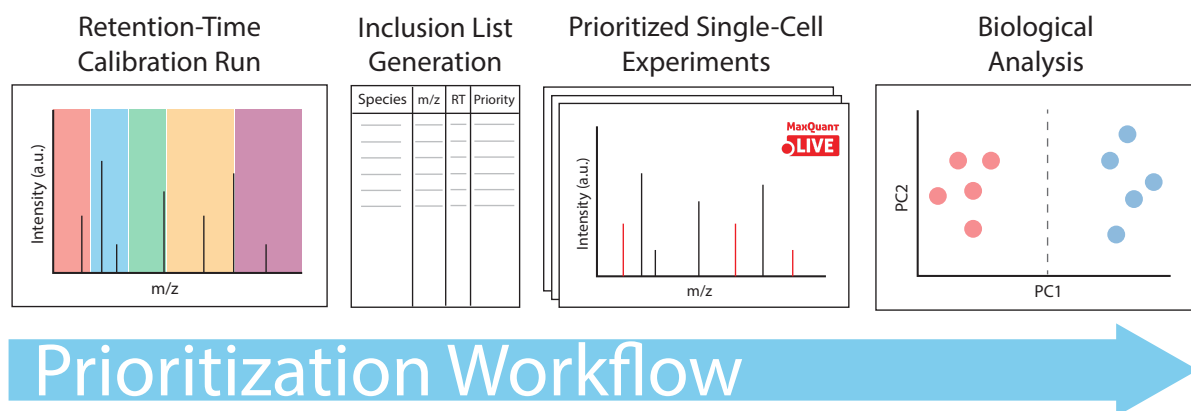

**Supplemental Fig. S4 | pSCoPE workflow schematic**

The pSCoPE workflow begins with the assembly of a number of precursors of experimental interest which can originate from prior DDA or DIA analyses of bulk samples, DDA analyses of previous SCoPE samples, or literature. A DIA method is then applied to a 1x injection of carrier and reference material to generate accurate retention times for the peptides of interest. The user then stratifies the peptides identified during the retention-time calibration run into priority levels, with the top priority level containing peptides of highest experimental interest. The prioritized inclusion list is imported into MaxQuant.Live for prioritized analysis of SCoPE samples.

| Raw.file | AnnotationLayer | RI5 | RI6 | RI7 | RI8 | RI9 | RI10 | RI11 | RI12 | RI13 | RI14 | RI15 | RI16 | RI17 | RI18 |
|----------|-----------------|-----|-----|-----|-----|-----|------|------|------|------|------|------|------|------|------|
| wGH0760  | CellType        | H   | H   | H   | H   | H   | H    | H    | neg  | M    | M    | M    | M    | M    | M    |
|          | SpikeInPeptides | 4x  | 4x  | 4x  | 2x  | 2x  | 2x   | 1x   | 1x   | 16x  | 16x  | 16x  | 8x   | 8x   | 8x   |
| wGH0763  | CellType        | M   | M   | M   | M   | M   | M    | M    | H    | H    | H    | H    | H    | H    | neg  |
|          | SpikeInPeptides | 16x | 16x | 16x | 8x  | 8x  | 8x   | 4x   | 4x   | 4x   | 2x   | 2x   | 2x   | 1x   | 1x   |
| wGH0766  | CellType        | M   | M   | M   | M   | H   | H    | H    | H    | H    | H    | neg  | M    | M    | M    |
|          | SpikeInPeptides | 8x  | 8x  | 8x  | 4x  | 4x  | 4x   | 2x   | 2x   | 2x   | 1x   | 1x   | 16x  | 16x  | 16x  |
| wGH0769  | CellType        | H   | H   | H   | H   | H   | H    | H    | neg  | M    | M    | M    | M    | M    | M    |
|          | SpikeInPeptides | 4x  | 4x  | 4x  | 2x  | 2x  | 2x   | 1x   | 1x   | 16x  | 16x  | 16x  | 8x   | 8x   | 8x   |
| wGH0772  | CellType        | M   | M   | M   | M   | M   | M    | M    | H    | H    | H    | H    | H    | H    | neg  |
|          | SpikeInPeptides | 16x | 16x | 16x | 8x  | 8x  | 8x   | 4x   | 4x   | 4x   | 2x   | 2x   | 2x   | 1x   | 1x   |
| wGH0775  | CellType        | M   | M   | M   | M   | H   | H    | H    | H    | H    | H    | neg  | M    | M    | M    |
|          | SpikeInPeptides | 8x  | 8x  | 8x  | 4x  | 4x  | 4x   | 2x   | 2x   | 2x   | 1x   | 1x   | 16x  | 16x  | 16x  |
| wGH0778  | CellType        | H   | H   | H   | H   | H   | H    | H    | neg  | M    | M    | M    | M    | M    | M    |
|          | SpikeInPeptides | 4x  | 4x  | 4x  | 2x  | 2x  | 2x   | 1x   | 1x   | 16x  | 16x  | 16x  | 8x   | 8x   | 8x   |
| wGH0781  | CellType        | M   | M   | M   | M   | M   | M    | M    | H    | H    | H    | H    | H    | H    | neg  |
|          | SpikeInPeptides | 16x | 16x | 16x | 8x  | 8x  | 8x   | 4x   | 4x   | 4x   | 2x   | 2x   | 2x   | 1x   | 1x   |

### Supplemental Table S1 | Experimental design for spike-in analyses.

Schematic for the design of the single-cell sets used to benchmark reporter-ion quantitation in Fig. 3. Each row corresponds to a pSCoPE experiment with carriage-return-separated entries indicating cell type and spike-in concentration for each sample. The sample column headers denote the TMTpro 18plex label associated with each sample, with RI5 indicating 128C, RI6 indicating 129N, and so on. In the “cell type” section for each experiment, “H” denotes HEK293 cells, “M” denotes melanoma cells, and “neg” denotes negative control samples, which were identically processed to the single-cell samples, but which did not contain a cell.

| Set     | RI6       | RI7       | RI8       | RI9       | RI10      | RI11      | RI12      | RI13      | RI14      | RI15      | RI16      |
|---------|-----------|-----------|-----------|-----------|-----------|-----------|-----------|-----------|-----------|-----------|-----------|
| wGH0456 | LPS       | LPS       | LPS       | LPS       | LPS       | untreated | untreated | untreated | untreated | untreated | neg       |
| wGH0457 | untreated | untreated | untreated | untreated | neg       | LPS       | LPS       | LPS       | LPS       | LPS       | untreated |
| wGH0458 | untreated | untreated | untreated | neg       | LPS       | LPS       | LPS       | LPS       | untreated | LPS       | untreated |
| wGH0459 | LPS       | LPS       | LPS       | untreated | untreated | untreated | untreated | untreated | LPS       | neg       | LPS       |
| wGH0460 | untreated | untreated | untreated | untreated | untreated | neg       | LPS       | LPS       | LPS       | LPS       | LPS       |
| wGH0461 | untreated | untreated | untreated | untreated | neg       | LPS       | LPS       | LPS       | LPS       | LPS       | untreated |
| wGH0462 | LPS       | LPS       | untreated | untreated | untreated | untreated | untreated | neg       | LPS       | LPS       | LPS       |
| wGH0463 | untreated | untreated | untreated | neg       | LPS       | LPS       | LPS       | LPS       | untreated | LPS       | untreated |
| wGH0464 | untreated | untreated | neg       | LPS       | LPS       | LPS       | LPS       | LPS       | untreated | untreated | untreated |
| wGH0465 | LPS       | untreated | untreated | untreated | untreated | untreated | untreated | LPS       | LPS       | LPS       | LPS       |
| wGH0466 | LPS       | LPS       | untreated | untreated | untreated | untreated | untreated | neg       | LPS       | LPS       | LPS       |
| wGH0467 | LPS       | LPS       | LPS       | LPS       | untreated | untreated | untreated | untreated | neg       | untreated | LPS       |
| wGH0468 | untreated | untreated | untreated | neg       | LPS       | LPS       | LPS       | LPS       | untreated | LPS       | untreated |
| wGH0469 | LPS       | LPS       | LPS       | untreated | untreated | untreated | untreated | untreated | LPS       | neg       | LPS       |
| wGH0470 | untreated | untreated | untreated | untreated | neg       | LPS       | LPS       | LPS       | LPS       | LPS       | untreated |
| wGH0471 | untreated | untreated | untreated | neg       | LPS       | LPS       | LPS       | LPS       | untreated | LPS       | untreated |
| wGH0472 | LPS       | LPS       | LPS       | LPS       | LPS       | untreated | untreated | untreated | untreated | untreated | neg       |
| wGH0473 | LPS       | untreated | untreated | untreated | untreated | untreated | untreated | LPS       | LPS       | LPS       | LPS       |
| wGH0474 | LPS       | LPS       | LPS       | LPS       | LPS       | untreated | untreated | untreated | untreated | untreated | neg       |
| wGH0475 | untreated | untreated | untreated | untreated | neg       | LPS       | LPS       | LPS       | LPS       | LPS       | untreated |
| wGH0500 | LPS       | LPS       | untreated | untreated | untreated | untreated | untreated | neg       | LPS       | LPS       | LPS       |
| wGH0501 | LPS       | LPS       | LPS       | LPS       | untreated | untreated | untreated | untreated | neg       | untreated | LPS       |
| wGH0502 | LPS       | untreated | untreated | untreated | untreated | untreated | untreated | LPS       | LPS       | LPS       | LPS       |
| wGH0503 | LPS       | LPS       | LPS       | LPS       | untreated | untreated | untreated | untreated | neg       | untreated | LPS       |
| wGH0504 | LPS       | untreated | untreated | untreated | untreated | untreated | untreated | LPS       | LPS       | LPS       | LPS       |
| wGH0505 | untreated | untreated | untreated | neg       | LPS       | LPS       | LPS       | LPS       | untreated | LPS       | untreated |
| wGH0506 | untreated | untreated | untreated | untreated | neg       | LPS       | LPS       | LPS       | LPS       | LPS       | untreated |
| wGH0507 | LPS       | LPS       | LPS       | LPS       | untreated | untreated | untreated | untreated | neg       | untreated | LPS       |
| wGH0508 | LPS       | LPS       | LPS       | untreated | untreated | untreated | untreated | untreated | LPS       | neg       | LPS       |
| wGH0509 | untreated | untreated | untreated | untreated | neg       | LPS       | LPS       | LPS       | LPS       | LPS       | untreated |
| wGH0510 | LPS       | untreated | untreated | untreated | untreated | untreated | untreated | LPS       | LPS       | LPS       | LPS       |
| wGH0511 | LPS       | LPS       | LPS       | LPS       | untreated | untreated | untreated | untreated | neg       | untreated | LPS       |
| wGH0512 | LPS       | untreated | untreated | untreated | untreated | untreated | untreated | LPS       | LPS       | LPS       | LPS       |
| wGH0513 | LPS       | LPS       | LPS       | untreated | untreated | untreated | untreated | untreated | LPS       | neg       | LPS       |
| wGH0514 | untreated | untreated | untreated | untreated | neg       | LPS       | LPS       | LPS       | LPS       | LPS       | untreated |
| wGH0515 | LPS       | LPS       | LPS       | LPS       | untreated | untreated | untreated | untreated | neg       | untreated | LPS       |
| wGH0516 | LPS       | LPS       | LPS       | LPS       | LPS       | untreated | untreated | untreated | untreated | untreated | neg       |
| wGH0517 | LPS       | LPS       | untreated | untreated | untreated | untreated | untreated | neg       | LPS       | LPS       | LPS       |
| wGH0518 | LPS       | LPS       | LPS       | untreated | untreated | untreated | untreated | untreated | LPS       | neg       | LPS       |
| wGH0519 | untreated | untreated | neg       | LPS       | LPS       | LPS       | LPS       | LPS       | untreated | untreated | untreated |
| wGH0520 | LPS       | LPS       | LPS       | LPS       | LPS       | untreated | untreated | untreated | untreated | untreated | neg       |
| wGH0521 | LPS       | untreated | untreated | untreated | untreated | untreated | untreated | LPS       | LPS       | LPS       | LPS       |
| wGH0522 | LPS       | LPS       | untreated | untreated | untreated | untreated | untreated | neg       | LPS       | LPS       | LPS       |
| wGH0523 | untreated | untreated | untreated | untreated | neg       | LPS       | LPS       | LPS       | LPS       | LPS       | untreated |
| wGH0524 | LPS       | LPS       | LPS       | LPS       | untreated | untreated | untreated | untreated | neg       | untreated | LPS       |
| wGH0525 | LPS       | LPS       | LPS       | LPS       | LPS       | untreated | untreated | untreated | untreated | untreated | neg       |
| wGH0526 | LPS       | LPS       | LPS       | LPS       | LPS       | untreated | untreated | untreated | untreated | untreated | neg       |
| wGH0527 | untreated | untreated | untreated | untreated | untreated | neg       | LPS       | LPS       | LPS       | LPS       | LPS       |
| wGH0528 | untreated | untreated | untreated | untreated | untreated | neg       | LPS       | LPS       | LPS       | LPS       | LPS       |
| wGH0529 | untreated | untreated | neg       | LPS       | LPS       | LPS       | LPS       | LPS       | untreated | untreated | untreated |
| wGH0530 | LPS       | LPS       | untreated | untreated | untreated | untreated | untreated | neg       | LPS       | LPS       | LPS       |
| wGH0531 | untreated | untreated | untreated | neg       | LPS       | LPS       | LPS       | LPS       | untreated | LPS       | untreated |
| wGH0532 | untreated | untreated | neg       | LPS       | LPS       | LPS       | LPS       | LPS       | untreated | untreated | untreated |
| wGH0533 | untreated | untreated | untreated | untreated | untreated | neg       | LPS       | LPS       | LPS       | LPS       | LPS       |
| wGH0534 | untreated | untreated | untreated | neg       | LPS       | LPS       | LPS       | LPS       | untreated | LPS       | untreated |
| wGH0535 | untreated | untreated | neg       | LPS       | LPS       | LPS       | LPS       | LPS       | untreated | untreated | untreated |
| wGH0536 | LPS       | LPS       | untreated | untreated | untreated | untreated | untreated | neg       | LPS       | LPS       | LPS       |
| wGH0537 | LPS       | LPS       | LPS       | LPS       | untreated | untreated | untreated | untreated | neg       | untreated | LPS       |
| wGH0538 | LPS       | LPS       | LPS       | untreated | untreated | untreated | untreated | untreated | LPS       | neg       | LPS       |
| wGH0539 | LPS       | untreated | untreated | untreated | untreated | untreated | untreated | LPS       | LPS       | LPS       | LPS       |

### Supplemental Table S2 | Experimental design for single-cell BMDM analyses.

Schematic for the design of the single-cell sets composing the bone-marrow-derived macrophage (BMDM) analyses associated with Figs. 4/5/6. Each row corresponds to a pSCoPE experiment. The sample column headers denote the TMTpro 16plex label associated with each sample, with RI6 indicating 129N, RI7 indicating 129C, and so on. “LPS” denotes BMDMs that were stimulated with LPS for 24 hours, “untreated” denotes BMDMs that were not stimulated with LPS, and “neg” denotes negative control samples, which were identically processed to the single-cell samples, but which did not contain a cell. RI1 contained the carrier sample; RI2 contained the reference sample; RI3 and 4 were unused due to isotopic contamination from the carrier and reference channels, respectively; single-cell samples labeled with RI5 were unused in downstream analysis due to isotopic contamination from the carrier channel evident during QC steps.

| <b>MS1 Settings:</b>        | <b>Method 1</b> | <b>Method 2</b> | <b>Method 3</b> | <b>Method 4</b> | <b>Method 5</b> |
|-----------------------------|-----------------|-----------------|-----------------|-----------------|-----------------|
| <b>Polarity:</b>            | Positive        | Positive        | Positive        | Positive        | Positive        |
| <b>Resolution:</b>          | 140k            | 140k            | 140k            | 70k             | 140k            |
| <b>AGC Target:</b>          | 3e6             | 3e6             | 3e6             | 3e6             | 3e6             |
| <b>Max Injection Time:</b>  | 512ms           | 512ms           | 512ms           | 300ms           | 512ms           |
| <b>Scan Range (Th):</b>     | 450-1600        | 450-1600        | 450-1258        | 478-1470        | 400-800         |
| <b>DIA Scan Settings:</b>   |                 |                 |                 |                 |                 |
| <b>Default Charge State</b> | 2               | 2               | 2               | 2               | 2               |
| <b>Polarity</b>             | Positive        | Positive        | Positive        | Positive        | Positive        |
| <b>Resolution</b>           | 35k             | 35k             | 35k             | 35k             | 17.5k           |
| <b>AGC target</b>           | 5e5             | 5e5             | 5e5             | 3e6             | 5e5             |
| <b>Max Injection Time</b>   | auto            | auto            | auto            | 110ms           | 64ms            |
| <b>MSX Count</b>            | 1               | 1               | 1               | 1               | 1               |
| <b>MSX isochronous</b>      | on              | on              | on              | on              | on              |
| <b>Fixed first mass</b>     | 200             | 200             | 200             | 200             | 200             |
| <b>NCE</b>                  | 33              | 33              | 33              | 27              | 27              |
| <b>DIA window scheme</b>    | 1               | 2               | 3               | 4               | 5               |

**Supplemental Table S3 | MS Methods for DIA Acquisitions:** Parameters for data acquisition for the DIA methods used in this publication. Accompanying DIA window schemes can be found in Supporting Table S5. Chromatographic methods used with these DIA methods can be found in Supporting Table S4. The text in black denotes parameters which are in common with the default method (Method 1), while the red text denotes parameters which vary from the default method.



| <b>Time:</b> | <b>Meth. 1</b> | <b>Time</b> | <b>Meth. 2</b> | <b>Time</b> | <b>Meth. 3</b> | <b>Time</b> | <b>Meth. 4</b> |
|--------------|----------------|-------------|----------------|-------------|----------------|-------------|----------------|
| 0 min.       | 4% B           | 0 min.      | 4% B           | 0 min.      | 4% B           | 0 min.      | 4% B           |
| 4 min.       | 4% B           | 4 min.      | 4% B           | 4 min.      | 4% B           | 4 min.      | 4% B           |
| 12 min.      | 8% B           | 12 min.     | 8% B           | 12 min.     | 7% B           | 22 min.     | 8% B           |
| 75 min.      | 35% B          | 75 min.     | 35% B          | 135 min.    | 32% B          | 130 min.    | 29% B          |
| 77 min.      | 95% B          | 77 min.     | 95% B          | 137 min.    | 95% B          | 134 min.    | 95% B          |
| 80.1 min.    | 4% B           | 80.1 min.   | 4% B           | 140.1 min.  | 4% B           | 140.1 min.  | 4% B           |
| 95 min.      | 4% B           | 105 min.    | 4% B           | 160 min.    | 4% B           | 155 min.    | 4% B           |
| end          | 4% B           | end         | 4% B           | end         | 4% B           | end         | 4% B           |

**Supplemental Table S4 | Gradient Methods for DIA Acquisitions:** Chromatographic parameters for the DIA methods used in this publication. Accompanying instrument parameters can be found in Supporting Table [S3](#).

| <b>DIA Window Scheme</b>      | <b>1</b>     | <b>2</b>      | <b>3</b>   | <b>4</b>   | <b>5</b>  |
|-------------------------------|--------------|---------------|------------|------------|-----------|
| <b>Window 1:</b>              |              |               |            |            |           |
| <b>Loop Count:</b>            | 21           | 21            | 21         | 25         | 20        |
| <b>Isolation Window (Th):</b> | 20           | 15            | 20         | 12.5       | 19.5      |
| <b>Spans (Th):</b>            | 450-860      | 450-755       | 450-860    | 450-778.5  | 400-799.5 |
| <b>Window 2:</b>              |              |               |            |            |           |
| <b>Loop Count:</b>            | 7            | 8             | 8          | 7          |           |
| <b>Isolation Window (Th):</b> | 50           | 20            | 50         | 25         |           |
| <b>Spans (Th):</b>            | 859.5-1206.5 | 754.5-911     | 859.5-1256 | 778 - 950  |           |
| <b>Window 3:</b>              |              |               |            |            |           |
| <b>Loop Count:</b>            | 1            | 6             |            | 8          |           |
| <b>Isolation Window (Th):</b> | 394          | 50            |            | 62.5       |           |
| <b>Spans (Th):</b>            | 1206 - 1600  | 910.5-1208    |            | 949.5-1446 |           |
| <b>Window 4:</b>              |              |               |            |            |           |
| <b>Loop Count:</b>            |              | 1             |            |            |           |
| <b>Isolation Window (Th):</b> |              | 393           |            |            |           |
| <b>Spans (Th):</b>            |              | 1207.5-1600.5 |            |            |           |

**Supplemental Table S5 | DIA window schemes for DIA acquisitions:** This table contains DIA window parameters referenced in the associated instrument methods detailed in Supporting Table [S3](#) for the DIA methods used in this publication.

| <b>MS1 settings:</b>    | <b>Method 1</b>     | <b>Method 2</b>     | <b>Method 3</b>     | <b>Method 4</b>     | <b>Method 5</b>     |
|-------------------------|---------------------|---------------------|---------------------|---------------------|---------------------|
| Resolution              | 70k                 | 70k                 | 70k                 | 70k                 | 70k                 |
| AGC Target              | 1e6                 | 1e6                 | 1e6                 | 1e6                 | 1e6                 |
| Injection Time          | 100ms               | 100ms               | 100ms               | 100ms               | 100ms               |
| Scan Range (Th)         | 450-1600            | 450-1600            | 450-1600            | 450-1258            | 450-1258            |
| <b>MS2 settings:</b>    |                     |                     |                     |                     |                     |
| Resolution              | 70k                 | 35k                 | 70k                 | 140k                | 140k                |
| AGC Target              | 5e4                 | 5e4                 | 5e4                 | 5e4                 |                     |
| Injection Time          | 300 ms              | 150 ms              | 300ms               | 500 ms              | 600 ms              |
| TopN                    | 7                   | 14                  | 7                   | 4                   | 4                   |
| Isolation Window (Th)   | 0.7                 | 0.7                 | 0.5                 | 0.5                 | 0.5                 |
| Offset (Th)             | 0.3                 | 0.3                 | 0                   | 0                   | 0                   |
| Fixed First Mass (Th)   | 100                 | 100                 | 100                 | 100                 | 100                 |
| NCE                     | 33                  | 33                  | 33                  | 33                  | 33                  |
| Spectrum Type           | Centroid            | Centroid            | Centroid            | Centroid            | Centroid            |
| Min. AGC Target         | 2e4                 | 2e4                 | 2e4                 | 2e4                 | 2e4                 |
| Apex Triggering         | FALSE               | FALSE               | FALSE               | FALSE               | FALSE               |
| Charge Exclusion        | Unknown, 1, and > 6 | Unknown, 1, and > 6 | Unknown, 1, and > 6 | Unknown, 1, and > 6 | Unknown, 1, and > 6 |
| Peptide Match           | FALSE               | FALSE               | FALSE               | FALSE               | FALSE               |
| Exclude Isotopes        | Enabled             | Enabled             | Enabled             | Enabled             | Enabled             |
| Dynamic Exclusion (sec) | 30                  | 30                  | 30                  | 30                  | 30                  |

**Supplemental Table S6 | MS methods for Shotgun Acquisitions:** Parameters for data acquisition for the shotgun methods used in this publication. Chromatographic methods used with these shotgun methods can be found in Supporting Table S7. The text in black denotes parameters which are in common with the default method (Method 1), while the red text denotes parameters which vary from the default method.

| <b>Time:</b> | <b>Methods 1</b> | <b>Time</b> | <b>Method 2</b> |
|--------------|------------------|-------------|-----------------|
| 0 min.       | 4% B             | 0 min.      | 4% B            |
| 4 min.       | 4% B             | 4 min.      | 4% B            |
| 12 min.      | 8% B             | 12 min.     | 8% B            |
| 75 min.      | 35% B            | 75 min.     | 35% B           |
| 77 min.      | 95% B            | 77 min.     | 95% B           |
| 80.1 min.    | 4% B             | 80.1 min.   | 4% B            |
| 95 min.      | 4% B             | 105 min.    | 4% B            |
| end          | 4% B             | end         | 4% B            |

**Supplemental Table S7 | Gradient Methods for Shotgun Acquisitions:** Chromatographic parameters for the shotgun methods used in this publication. Accompanying instrument parameters can be found in Supporting Table [S6](#).

| Purpose          | Sample   | MS Method       | Gradient | Inclusion List | Figure |
|------------------|----------|-----------------|----------|----------------|--------|
| Spectral Library | SQC, 10x | DIA:1           | 1        |                |        |
| Spectral Library | SQC, 10x | DIA:2           | 1        |                |        |
| Spectral Library | SQC, 1x  | DIA:1           | 1        |                |        |
| Spectral Library | SQC, 1x  | DIA:1           | 1        |                |        |
| RT Calibration   | SQC, 1x  | DIA:1           | 1        |                |        |
| Scout            | SQC, 1x  | pSCoPE:1        | 1        | 1              |        |
| Scout            | SQC, 1x  | pSCoPE:1        | 1        | 2              |        |
| Scout            | SQC, 1x  | pSCoPE:1        | 1        | 3              |        |
| Scout            | SQC, 1x  | pSCoPE:1        | 1        | 4              |        |
| pSCoPE Benchmark | SQC, 1x  | MaxQuant.Live:1 | 1        | 5              | 1      |
| pSCoPE Benchmark | SQC, 1x  | pSCoPE:1        | 1        | 5              | 1      |

**Supplemental Table S8 | Method and Sample Mapping: MaxQuant.Live Contrast Experiments, Fig. 1:** This table connects the experiments performed as part of Figure 1 with information regarding their sample type, instrument method, gradient, and inclusion list. More details regarding the instrument methods (Supporting Table S3, Supporting Table S6, Supporting Table S11), gradients (Supporting Table S4 and Supporting Table S7), and inclusion lists can be found in their respective tables and sections.

| Purpose           | Sample                | MS Method | Gradient | Inclusion List | Figure |
|-------------------|-----------------------|-----------|----------|----------------|--------|
| Spectral Library  | Carrier and Ref., 10x | DIA:1     | 1        |                |        |
| Spectral Library  | Carrier and Ref., 10x | DIA:2     | 1        |                |        |
| Spectral Library  | Carrier and Ref., 1x  | DIA:1     | 1        |                |        |
| Spectral Library  | Carrier and Ref., 1x  | DIA:1     | 1        |                |        |
| RT Calibration    | Carrier and Ref., 1x  | DIA:1     | 1        |                |        |
| Scout             | Carrier and Ref., 1x  | pSCoPE:2  | 1        | 6              |        |
| Scout             | Carrier and Ref., 1x  | pSCoPE:2  | 1        | 7              |        |
| Scout             | Carrier and Ref., 1x  | pSCoPE:2  | 1        | 8              |        |
| Scout             | Carrier and Ref., 1x  | pSCoPE:2  | 1        | 9              |        |
| pSCoPE Benchmark  | Single cell (nPOP)    | Shotgun:3 | 1        |                | 2      |
| pSCoPE Benchmark  | Single cell (nPOP)    | pSCoPE:2  | 1        | 10 and 11      | 2      |
| Spike-in Analysis | Single cell (nPOP)    | pSCoPE:3  | 1        | 12             | 3      |

**Supplemental Table S9 | Method and Sample Mapping: HEK and Melanoma Experiments, Figs. 2/3:** This table connects the experiments performed as part of Figures 2 and 3 with information regarding their sample type, instrument method, gradient, and inclusion list. More details regarding the instrument methods (Supporting Table S3, Supporting Table S6, and Supporting Table S12), gradients (Supporting Table S4 and Supporting Table S7), and inclusion lists can be found in their respective tables and sections.

| Purpose                       | Sample                                                         | MS Method | Gradient | Inclusion List | Figure |
|-------------------------------|----------------------------------------------------------------|-----------|----------|----------------|--------|
| Differential Protein Analysis | 1,800 cells from each condition (LPS and control)              | DDA:1     | 1        |                |        |
| Differential Protein Analysis | 1,800 cells from each condition (LPS and control)              | DDA:2     | 1        |                |        |
| Differential Protein Analysis | 1,000 cells from each condition (LPS and control), separately  | DIA:1     | 1        |                |        |
| Endocytosis Assay             | 10,000 cells from each condition (LPS and control), separately | DIA:5     | 4        |                | 5b     |
| MEROPS Validation             | 1 $\mu$ g from each condition (LPS and control), separately    | DIA:4     | 3        |                | 6a     |
| Spectral Library              | Carrier and Ref., 5x                                           | DIA:3     | 1        |                |        |
| Spectral Library              | Carrier and Ref., 1x                                           | DIA:3     | 1        |                |        |
| RT Calibration                | Carrier and Ref., 1x                                           | DIA:3     | 1        |                |        |
| Scout                         | Carrier and Ref., 1x                                           | pSCoPE:4  | 1        | 13             |        |
| pSCoPE Benchmark              | Single cell (nPOP)                                             | Shotgun:4 | 1        |                |        |
| pSCoPE Benchmark              | Single cell (nPOP)                                             | pSCoPE:5  | 1        | 14             | 4,5,6  |
| Method Development            | Single cell (mPOP)                                             | Shotgun:5 | 2        |                |        |
| Method Development            | Single cell (mPOP)                                             | pSCoPE:6  | 2        | 15             |        |

**Supplemental Table S10 | Method and Sample Mapping: BMDM samples, Figs. 4/5/6:** This table connects the experiments performed as part of Figures 4/5/6 with information regarding their sample type, instrument method, gradient, and inclusion list. More details regarding the instrument methods (Supporting Table S3, Supporting Table S6, Supporting Table S13, and Supporting Table S14), gradients (Supporting Table S4 and Supporting Table S7), and inclusion lists can be found in their respective tables and sections.

|                                     |                                         |
|-------------------------------------|-----------------------------------------|
| <b>Global settings: Survey scan</b> | <b>Scout Runs and Fig. 1 (Method 1)</b> |
| ScanDataAsProfile                   | True                                    |
| PositiveMode                        | True                                    |
| MaxIT                               | 100ms                                   |
| Resolution                          | 70,000                                  |
| AgcTarget                           | 1,000,000                               |
| MzRange                             | (450,1600)                              |
| BoxCarScans                         | 0                                       |
| <b>Global settings: TopN</b>        |                                         |
| NumOfMS2Scans                       | 0                                       |
| <b>RealtimeCorrection</b>           | <b>Scout Runs and Fig. 1 (Method 1)</b> |
| MzTolerances                        | (4.5,5)                                 |
| RetentionTimeTolerances             | (0.01,2)                                |
| SigmaScaleFactorRt                  | 3                                       |
| PeptideHistoryLength                | 2                                       |
| MinUsedCorrectionPeptides           | 50                                      |
| IntensityPeakRatioThreshold         | 1e-5                                    |
| PeptideDetectionIsoPeaks            | 2                                       |
| IsotopeTolerance                    | 9                                       |
| Ms2DetectionNeeded                  | False                                   |
| Ms2ExcludeDetectedPeptides          | False                                   |
| Ms2MinNormIntensity                 | 0.1                                     |
| Ms2MzTolerance                      | 20                                      |
| PIFWindowSize                       | 1.4                                     |
| <b>TargetedMs2</b>                  | <b>Scout Runs and Fig. 1 (Method 1)</b> |
| BatMode                             | False                                   |
| AutoPriority                        | True                                    |
| DefaultPriority                     | 0                                       |
| MaxNumOfScans                       | 1                                       |
| WindowAndOffsetInDalton             | False                                   |
| ScanDataAsProfile                   | False                                   |
| WindowSize                          | 0.5                                     |
| MzOffset                            | 0                                       |
| LowerMzBound                        | 100                                     |
| CollisionEnergy                     | 33                                      |
| LifeTime                            | 2,400ms                                 |
| Resolution                          | 70,000                                  |
| MaxIT                               | 300ms                                   |
| AgcTarget                           | 3,000,000                               |
| PositiveMode                        | True                                    |

**Supplemental Table S11 | Prioritized acquisition parameters for benchmarking MaxQuant.Live with and without prioritization, Fig. 1** This table contains the MaxQuant.Live parameters used in experiments associated with Figure 1. The experiment-type-to-method mapping for these methods can be found in the corresponding table (Supporting Table S8).



| <b>Global settings: Survey scan</b> | <b>Scout Runs and Fig. 2 (Method 2)</b> | <b>Fig. 3 (Method 3)</b> |
|-------------------------------------|-----------------------------------------|--------------------------|
| ScanDataAsProfile                   | True                                    | True                     |
| PositiveMode                        | True                                    | True                     |
| MaxIT                               | 100ms                                   | 100ms                    |
| Resolution                          | 70,000                                  | 70,000                   |
| AgcTarget                           | 1,000,000                               | 1,000,000                |
| MzRange                             | (450,1600)                              | (450,1600)               |
| BoxCarScans                         | 0                                       | 0                        |
| <b>Global settings: TopN</b>        |                                         |                          |
| NumOfMS2Scans                       | 0                                       | 0                        |
| <b>RealtimeCorrection</b>           | <b>Scout Runs and Fig. 2 (Method 2)</b> | <b>Fig. 3 (Method 3)</b> |
| MzTolerances                        | (4.5,5)                                 | (4.5,5)                  |
| RetentionTimeTolerances             | (0.01,2)                                | (0.01,2)                 |
| SigmaScaleFactorRt                  | 3                                       | 3                        |
| PeptideHistoryLength                | 2                                       | 2                        |
| MinUsedCorrectionPeptides           | 50                                      | 50                       |
| IntensityPeakRatioThreshold         | 1e-5                                    | 1e-5                     |
| PeptideDetectionIsoPeaks            | 2                                       | 2                        |
| IsotopeTolerance                    | 9                                       | 9                        |
| Ms2DetectionNeeded                  | False                                   | False                    |
| Ms2ExcludeDetectedPeptides          | False                                   | False                    |
| Ms2MinNormIntensity                 | 0.1                                     | 0.1                      |
| Ms2MzTolerance                      | 20                                      | 20                       |
| PIFWindowSize                       | 1.4                                     | 1.4                      |
| <b>TargetedMs2</b>                  | <b>Scout Runs and Fig. 2 (Method 2)</b> | <b>Fig. 3 (Method 3)</b> |
| BatMode                             | False                                   | False                    |
| AutoPriority                        | True                                    | True                     |
| DefaultPriority                     | 0                                       | 0                        |
| MaxNumOfScans                       | 1                                       | 1                        |
| WindowAndOffsetInDalton             | False                                   | False                    |
| ScanDataAsProfile                   | False                                   | False                    |
| WindowSize                          | 0.5                                     | 0.5                      |
| MzOffset                            | 0                                       | 0                        |
| LowerMzBound                        | 100                                     | 100                      |
| CollisionEnergy                     | 33                                      | 33                       |
| LifeTime                            | 2,100ms                                 | 2,400ms                  |
| Resolution                          | 70,000                                  | 70,000                   |
| MaxIT                               | 300ms                                   | 300ms                    |
| AgcTarget                           | 3,000,000                               | 3,000,000                |
| PositiveMode                        | True                                    | True                     |

**Supplemental Table S12 | Prioritized acquisition parameters for HEK and melanoma single-cell sets, Fig. 2/3:** This table contains the MaxQuant.Live parameters used in experiments associated with Figures 2/3. The experiment-type-to-method mapping for these methods can be found in the corresponding table (Supporting Table S9).

| <b>Global settings: Survey scan</b> | <b>Scout sample (Method 4)</b> | <b>Single-cell sets (Method 5)</b> |
|-------------------------------------|--------------------------------|------------------------------------|
| ScanDataAsProfile                   | True                           | True                               |
| PositiveMode                        | True                           | True                               |
| MaxIT                               | 100ms                          | 100ms                              |
| Resolution                          | 70,000                         | 70,000                             |
| AgcTarget                           | 1,000,000                      | 1,000,000                          |
| MzRange                             | (450,1258)                     | (450,1258)                         |
| BoxCarScans                         | 0                              | 0                                  |
| <b>Global settings: TopN</b>        | <b>Scout sample (Method 4)</b> | <b>Single-cell sets (Method 5)</b> |
| NumOfMS2Scans                       | 0                              | 0                                  |
| <b>RealtimeCorrection</b>           | <b>Scout sample (Method 4)</b> | <b>Single-cell sets (Method 5)</b> |
| MzTolerances                        | (4.5,5)                        | (4.5,5)                            |
| RetentionTimeTolerances             | (0.01,2)                       | (0.01,2)                           |
| SigmaScaleFactorRt                  | 3                              | 3                                  |
| PeptideHistoryLength                | 2                              | 2                                  |
| MinUsedCorrectionPeptides           | 15                             | 15                                 |
| IntensityPeakRatioThreshold         | 1e-5                           | 1e-5                               |
| PeptideDetectionIsoPeaks            | 2                              | 2                                  |
| IsotopeTolerance                    | 9                              | 9                                  |
| Ms2DetectionNeeded                  | False                          | False                              |
| Ms2ExcludeDetectedPeptides          | False                          | False                              |
| Ms2MinNormIntensity                 | 0.1                            | 01                                 |
| Ms2MzTolerance                      | 20                             | 20                                 |
| <b>TargetedMs2</b>                  | <b>Scout sample (Method 4)</b> | <b>Single-cell sets (Method 5)</b> |
| BatMode                             | False                          | False                              |
| AutoPriority                        | True                           | True                               |
| DefaultPriority                     | 0                              | 0                                  |
| MaxNumOfScans                       | 1                              | 1                                  |
| WindowAndOffsetInDalton             | False                          | False                              |
| ScanDataAsProfile                   | False                          | False                              |
| WindowSize                          | 0.5                            | 0.5                                |
| MzOffset                            | 0                              | 0                                  |
| LowerMzBound                        | 100                            | 100                                |
| CollisionEnergy                     | 33                             | 33                                 |
| LifeTime                            | 2,400ms                        | 2,100ms                            |
| Resolution                          | 140,000                        | 140,000                            |
| MaxIT                               | 500ms                          | 500ms                              |
| AgcTarget                           | 1,000,000                      | 1,000,000                          |
| PositiveMode                        | True                           | True                               |

**Supplemental Table S13 | Prioritized acquisition parameters for nPOP BMDM single-cell samples, Fig. 4/5/6:** This table contains the MaxQuant.Live parameters used in experiments associated with Figures 4/5/6. The experiment-type-to-method mapping for these methods can be found in the corresponding table (Supporting Table S10).

|                                     |                                         |
|-------------------------------------|-----------------------------------------|
| <b>Global settings: Survey scan</b> | <b>mPOP Single-cell sets (Method 6)</b> |
| ScanDataAsProfile                   | True                                    |
| PositiveMode                        | True                                    |
| MaxIT                               | 100ms                                   |
| Resolution                          | 70,000                                  |
| AgcTarget                           | 1,000,000                               |
| MzRange                             | (450,1258)                              |
| BoxCarScans                         | 0                                       |
| <b>Global settings: TopN</b>        | <b>mPOP Single-cell sets (Method 6)</b> |
| NumOfMS2Scans                       | 0                                       |
| <b>RealtimeCorrection</b>           | <b>mPOP Single-cell sets (Method 6)</b> |
| MzTolerances                        | (4.5,5)                                 |
| RetentionTimeTolerances             | (0.01,1.5)                              |
| SigmaScaleFactorRt                  | 3                                       |
| PeptideHistoryLength                | 2                                       |
| MinUsedCorrectionPeptides           | 15                                      |
| IntensityPeakRatioThreshold         | 1e-5                                    |
| PeptideDetectionIsoPeaks            | 2                                       |
| IsotopeTolerance                    | 9                                       |
| Ms2DetectionNeeded                  | False                                   |
| Ms2ExcludeDetectedPeptides          | False                                   |
| Ms2MinNormIntensity                 | 0.1                                     |
| Ms2MzTolerance                      | 20                                      |
| <b>TargetedMs2</b>                  | <b>mPOP Single-cell sets (Method 6)</b> |
| BatMode                             | False                                   |
| AutoPriority                        | True                                    |
| DefaultPriority                     | 0                                       |
| MaxNumOfScans                       | 1                                       |
| WindowAndOffsetInDalton             | False                                   |
| ScanDataAsProfile                   | NA                                      |
| WindowSize                          | 0.5                                     |
| MzOffset                            | 0                                       |
| LowerMzBound                        | 100                                     |
| CollisionEnergy                     | 33                                      |
| LifeTime                            | 2,400ms                                 |
| Resolution                          | 140,000                                 |
| MaxIT                               | 600ms                                   |
| AgcTarget                           | 1,000,000                               |
| PositiveMode                        | True                                    |

**Supplemental Table S14 | Prioritized acquisition parameters for mPOP BMDM single-cell samples:** This table contains the MaxQuant.Live parameters used in preliminary experiments. The experiment-type-to-method mapping for these methods can be found in the corresponding table (Supporting Table [S10](#)).
